# Supplementary material
Source: PubMed Central journal article supplement (PMC2522346)
Supplement: JCI0834739sd.pdf [file JCI0834739sd.pdf]

pS6

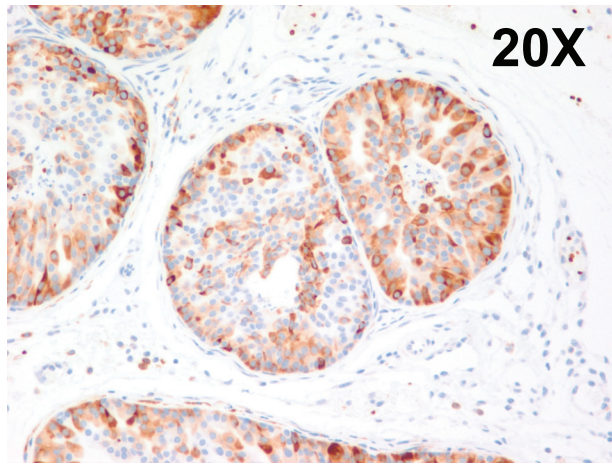

**Vehicle**

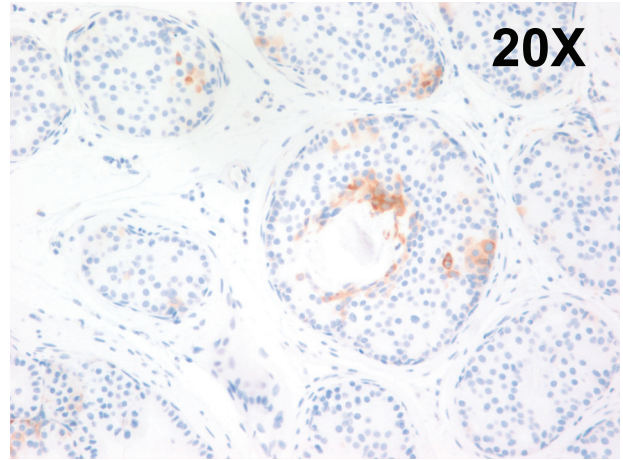

**RAD001**

**Supplementary Figure 1.** RAD001 efficiently inhibits mTORC1 in *Pten*-null prostate tumors. Phosphorylated RpS6 immunostaining in *Pten*-null mouse prostates, treated with vehicle or RAD001 for 4 weeks. A representative area is shown. n=3 mice per group.

**A**

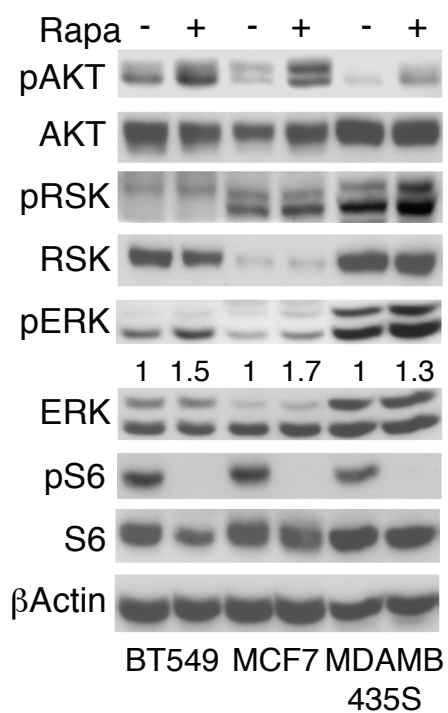

**B**

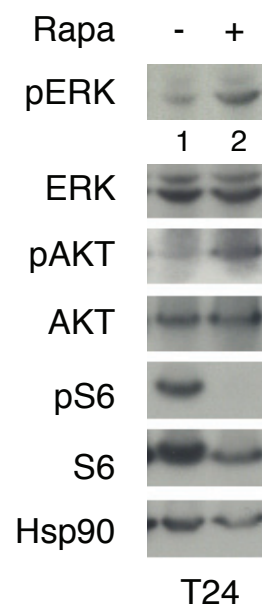

**Supplementary Figure 2.** Rapamycin activates MAPK in cancer cell lines. (A-B) Effect of rapamycin treatment (20 nM, 24 h) on ERK, AKT, RSK and RpS6 phosphorylation in breast (A) and bladder cancer cells (B), n=3. Numbers indicate the ratio of ERK phosphorylation related to total ERK levels.

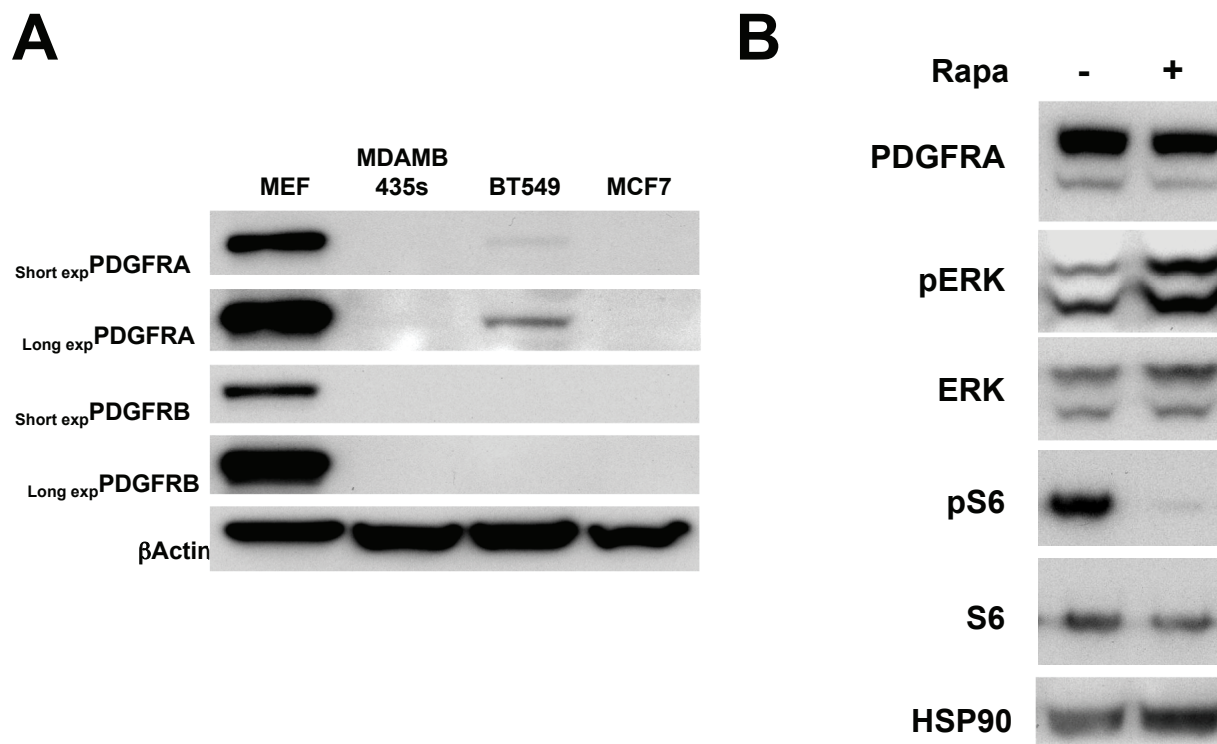

**Supplementary Figure 3.** Rapamycin does not affect PDGFRs expression in breast cancer cells. **(A)** Expression of PDGFRA and B in breast cancer cells, using MEF as a positive control, a representative western blot is shown. **(B)** Effect of rapamycin (20 nM, 24 h) on PDGFRA protein levels in BT549 cells. n=2.

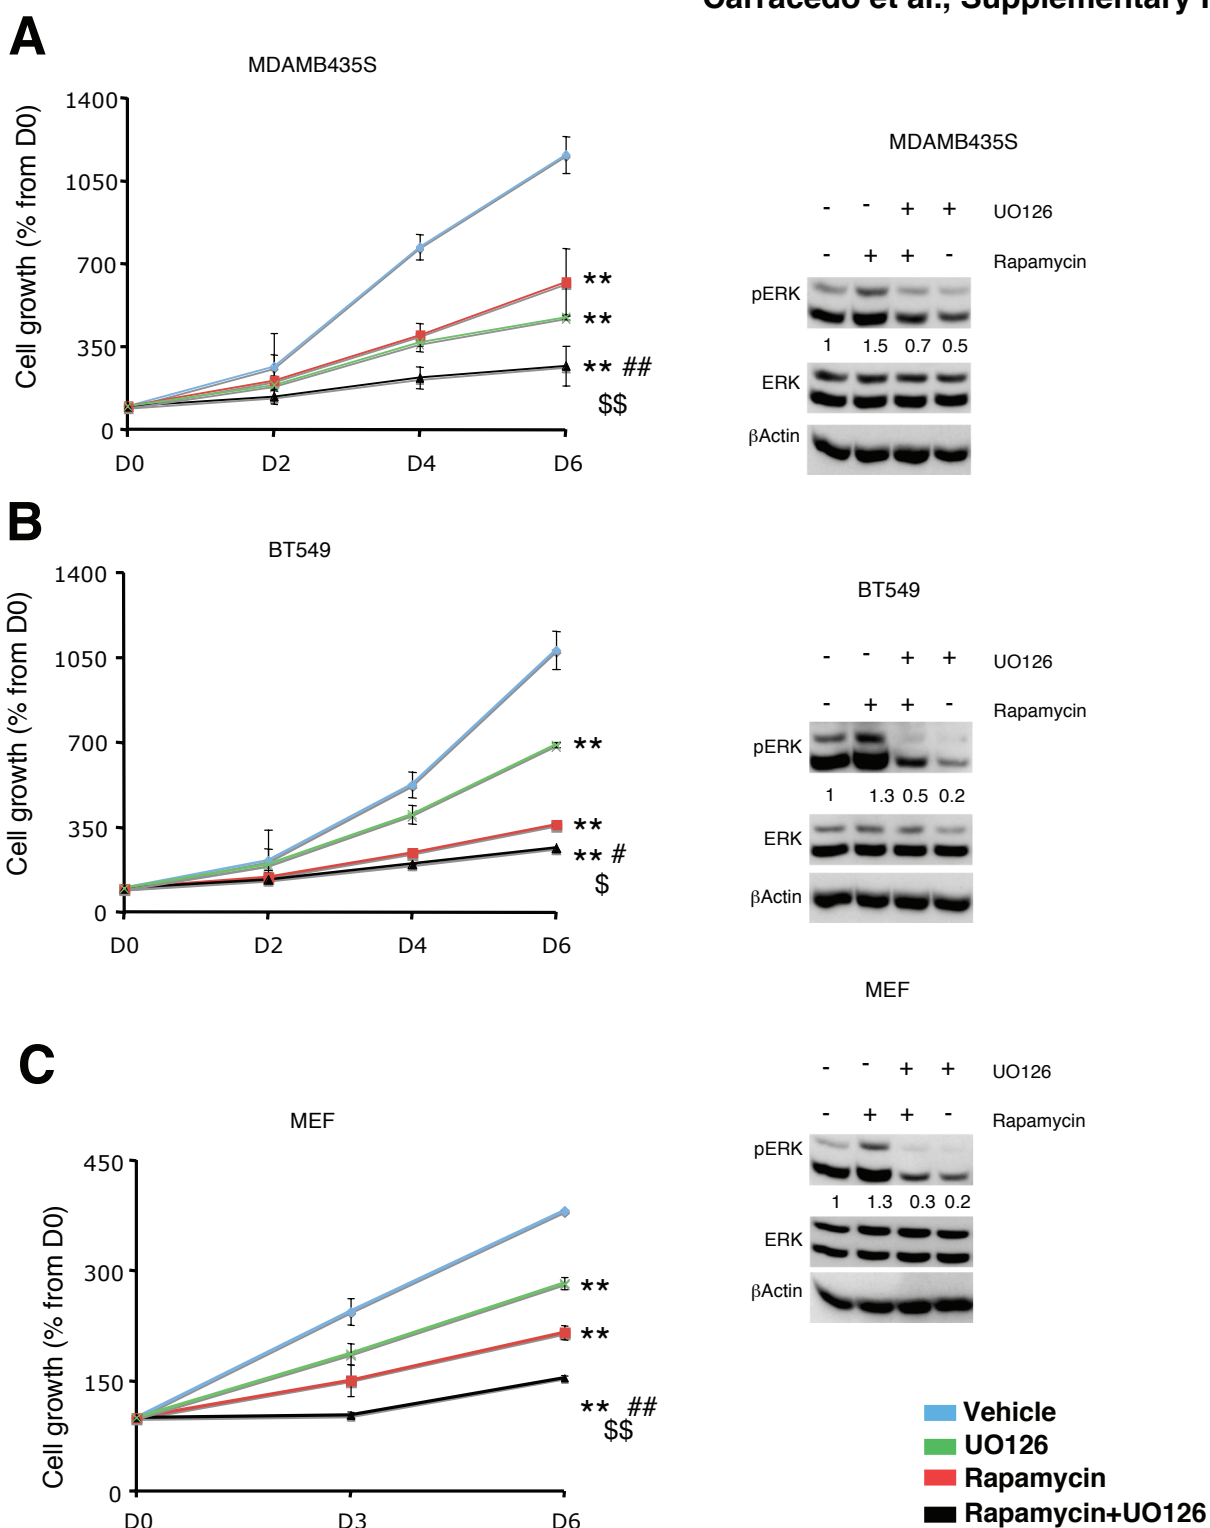

**Supplementary Figure 4.** MEK1/2 pharmacological inhibition enhances the growth-inhibitory activity of rapamycin. Effect of rapamycin (20 nM), UO126 (10  $\mu$ M) or the combination of both on cell growth (left panels) and ERK phosphorylation (right panels),  $n=4$ , representative western blot analysis is shown. Numbers indicate the ratio of phosphorylated protein compared to total protein. \*\*,  $p < 0.01$  from vehicle-treated cells; #,  $p < 0.05$  and ##,  $p > 0.01$  from rapamycin-treated cells; \$,  $p < 0.05$  and \$\$,  $p < 0.01$  from UO126-treated cells.

20 $\mu$ m

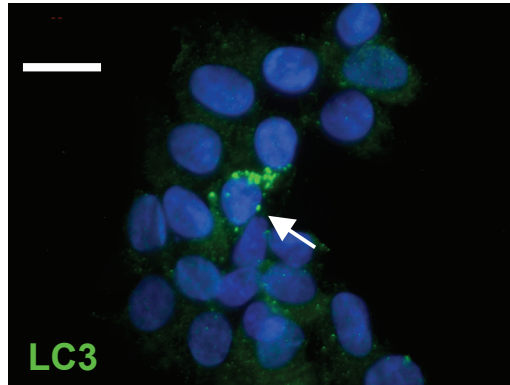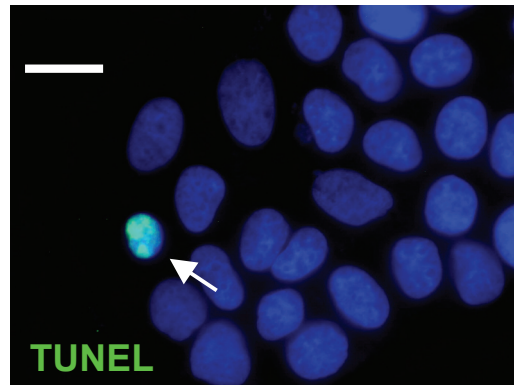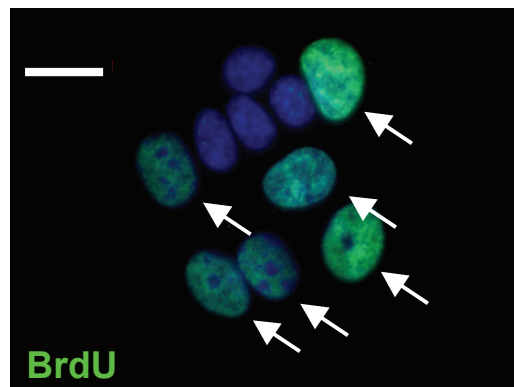

**Supplementary Figure 5.** Immunofluorescence staining of LC3, BrdU and TUNEL in MCF7 cells. Arrows indicate positive cells, a representative field for the staining is shown.

**A**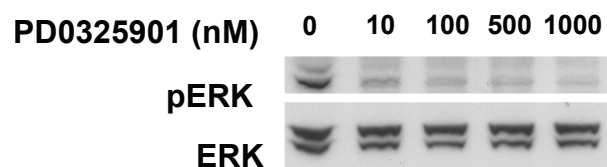**B**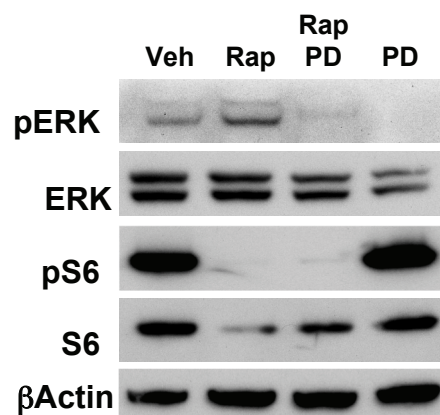**C**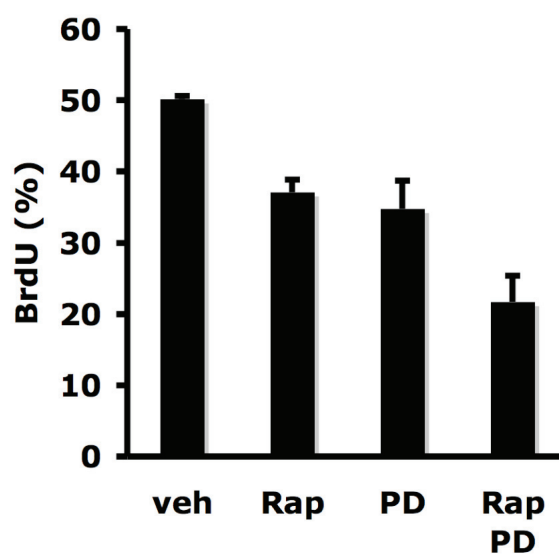

**Supplementary Figure 6.** MEK1/2 pharmacological inhibition by PD0325901 (PD) enhances the growth-inhibitory activity of rapamycin (Rap). (A) Dose-dependent inhibition of ERK by PD0325901 in MCF7 cells, n=2. (B-C) Effect of PD0325901 (100nM) alone or in combination with rapamycin (20nM) on S6 and ERK phosphorylation (B, 24h) and BrdU incorporation (C, 24h), n=2.
